# Supplementary material for: Double Metal Oxide Electron Transport Layers for Colloidal Quantum Dot Light-Emitting Diodes
Source: MDPI journal article supplement (doi:10.3390/nano10040726), 2020-04-11
Supplement: s1 [file s1]

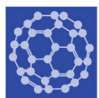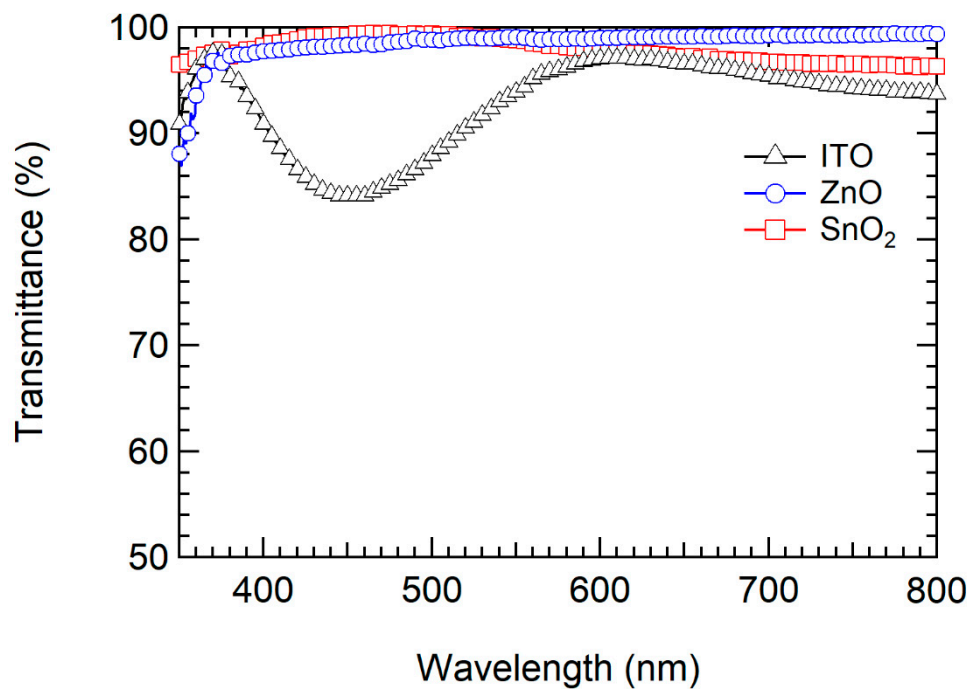

Figure S1. Transmittance spectra of ITO, ZnO NPs and SnO<sub>2</sub> NPs.

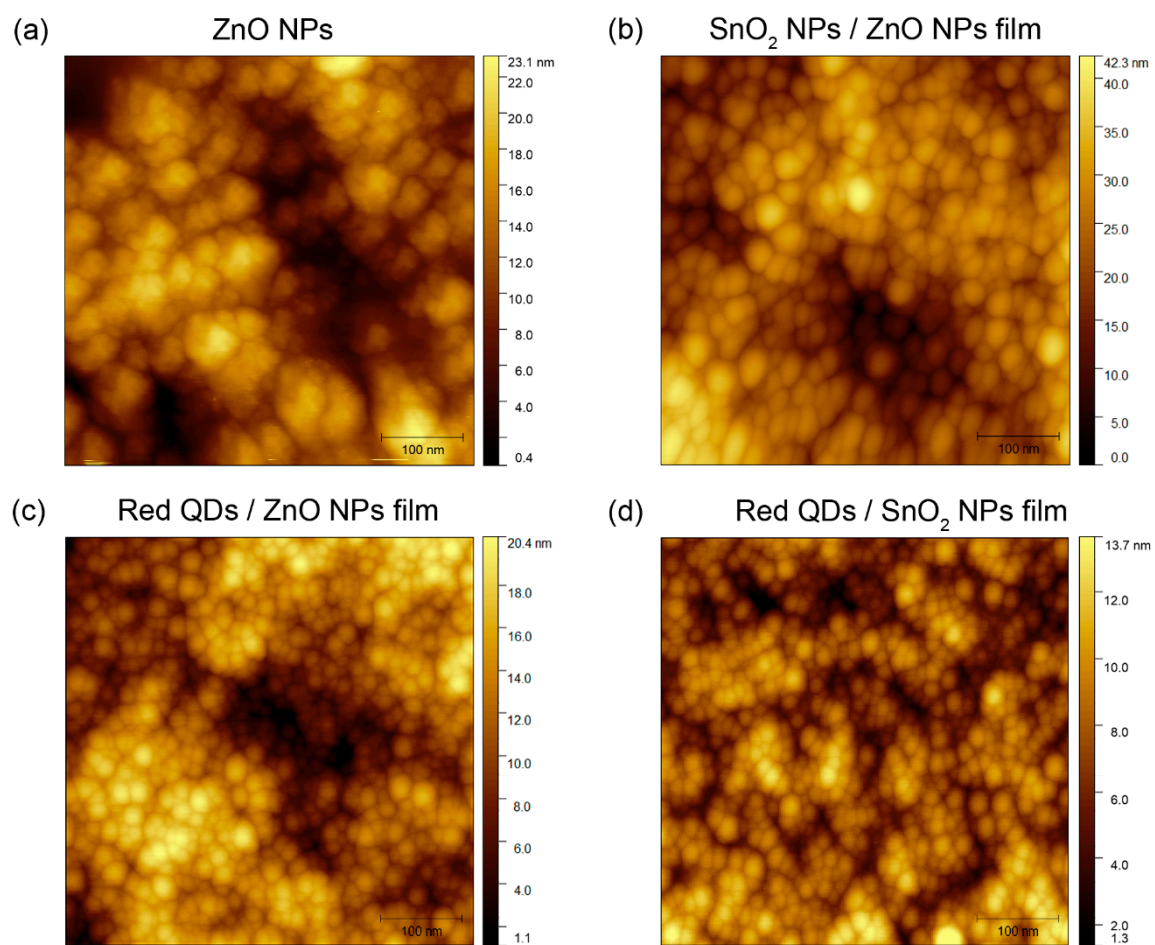

**Figure S2.** AFM topography of (a) ZnO NPs, (b) SnO<sub>2</sub> NPs on ZnO NPs, (c) QDs on ZnO NPs and (d) QDs on SnO<sub>2</sub> NPs.

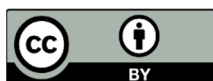

© 2020 by the authors. Licensee MDPI, Basel, Switzerland. This article is an open access article distributed under the terms and conditions of the Creative Commons Attribution (CC BY) license (<http://creativecommons.org/licenses/by/4.0/>).
